# Supplementary material for: Three-dimensional hierarchical metal oxide–carbon electrode materials for highly efficient microbial electrosynthesis
Source: Royal Society of Chemistry journal article supplement (doi:10.1039/c7se00073a), 2017-01-01
Supplement: c7se00073a1.pdf [file c7se00073a1.pdf]

## Supporting Information

### Three-dimensional Hierarchical Metal-Carbon Electrode Material for High Efficient Microbial Electrosynthesis

*Mengmeng Cui, Huarong Nie\*, Tian Zhang, Derek R. Lovley \*, Thomas P. Russell\**

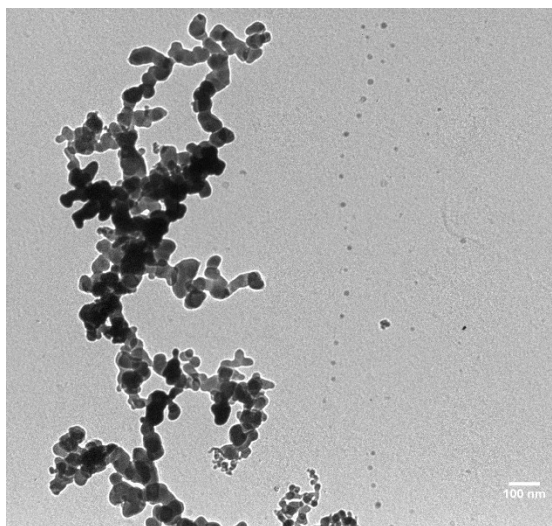

**Figure S1.** TEM image of dendritic nanostructures: the contrast difference further demonstrates the hybrid property of material.

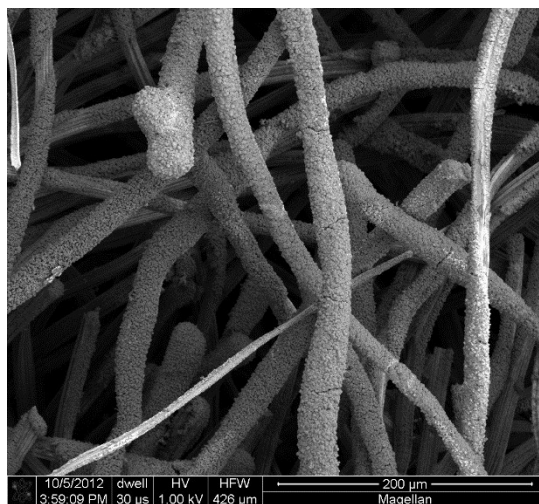

**Figure S2.** SEM image of modified carbon felt after sonicating in water for 30 mins which identify the physical stability of nano-dendritic structures.

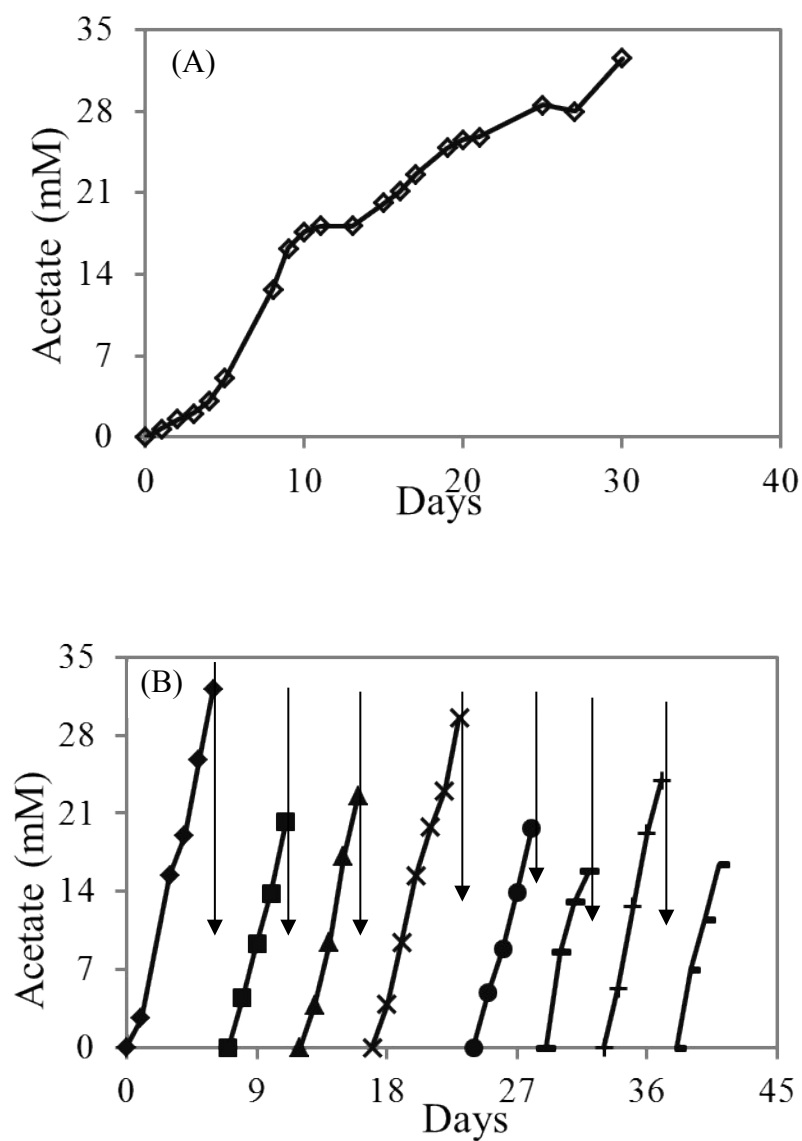

**Figure S3.** Acetate production over time with different cathodes: (A) unmodified carbon felt, (B) modified carbon felt. The arrow in Figure B indicates fresh medium swapped.
